# Supplementary material for: Improved selectivity of an engineered multi-product terpene synthase
Source: Royal Society of Chemistry journal article supplement (doi:10.1039/c4ob00479e), 2014-01-01
Supplement: c4ob00479e1.pdf [file c4ob00479e1.pdf]

## Supplementary Information

### Improved selectivity of an engineered multi-product terpene synthase

Ryan Lauchli, Julia Pitzer, Rebekah Z. Kitto, Karolina Z. Kalbarczyk, and Kersten S. Rabe

**Figure S1** Comparison of the reactions of FPP (a) and **S1** (b) catalyzed by Cop2.

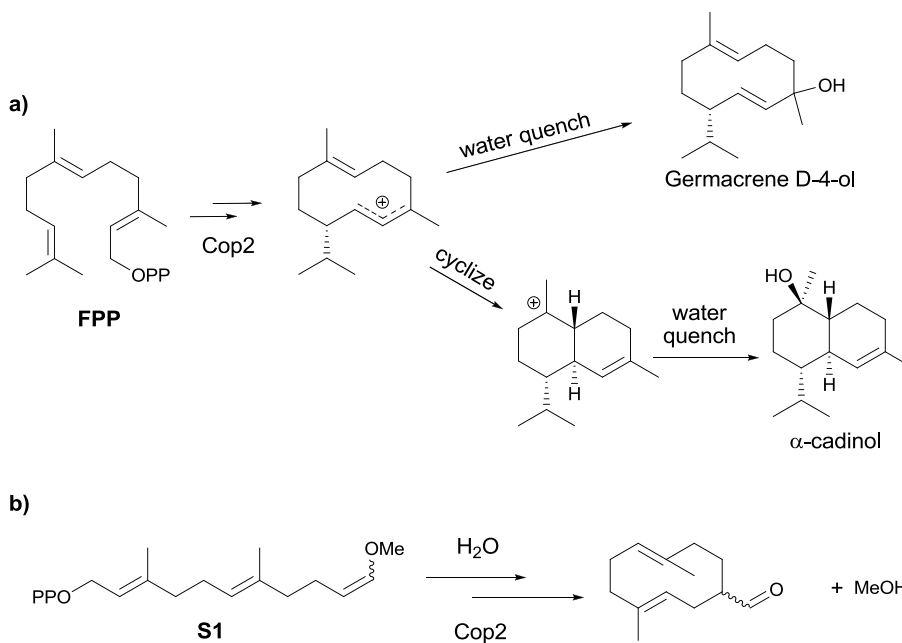

**Figure S2** Product distributions in % with the enzymes indicated and 300  $\mu\text{M}$  of FPP including error bars.

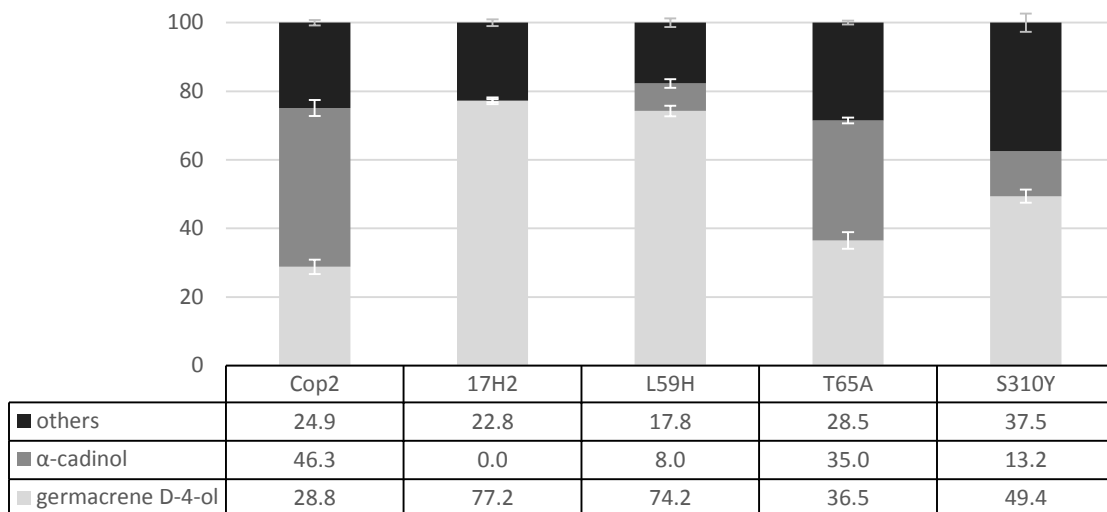

**Figure S3** Product formation of Cop2 with FPP, using Michaelis-Menten kinetics for curve fitting with the software Prism.

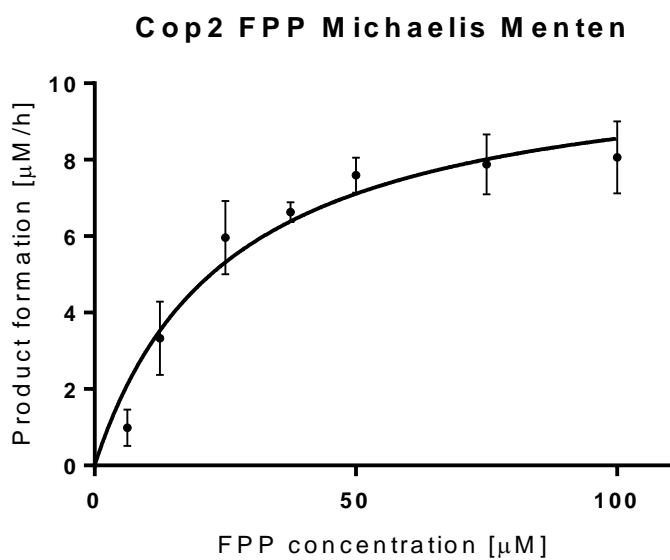

**Figure S4** Product formation of 17H2 with FPP, using Michaelis-Menten kinetics for curve fitting with the software Prism.

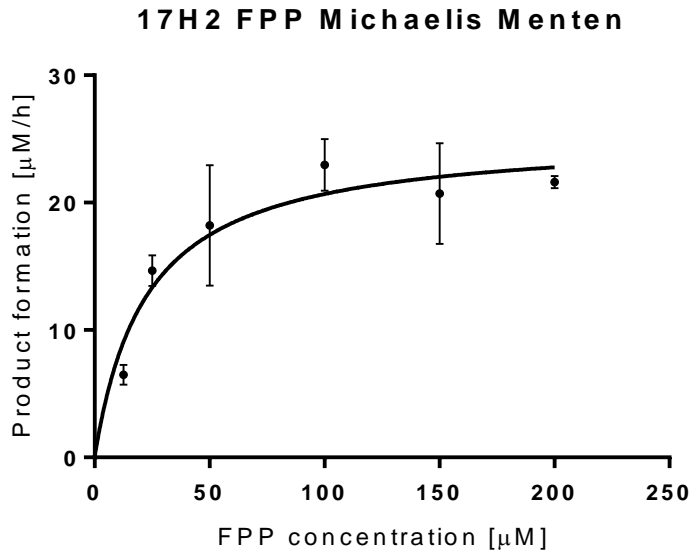

**Nucleotide and amino acid sequences (base pair mutations highlighted in yellow, amino acid mutations highlighted in green)**

**Figure S5** Nucleotide sequence of full-length, wild-type Cop2

```

ATGCCAAGTCCCGCGGGAGCGCTTCCCAAGTCCTTCATACTCCCGACCTGGTCAACGACTGCCCATTCCTTCGAGTCAACC
CACTCTGCGACGAGGTTGGGAGACTATCCGAGCAATGGTTCCTCCGCTATGCAAATTATTCGCCCCCTCGGGCAGTGGCGTTTA
TGGCACTCAAAGCGGGCGAGCTCACTGCTGCATGCTACCCAGATGCCGATGCCTTCCATCTCCGAGTCAGCGACGACTTCATG
AACTTCTCTTCAATGCCGACGATTGGCTAGACGACTTCGACATTGAGGACACGTACGGGCTGGCCAATTGTACTGTTTCGAGCC
CTGCGCGACCCAGTCAACTTCATTACTGATAAACGCGCAGGACTAATGACGAAATCATATTTTTCTCGATTCTGAAGACCGCT
GGGCTCGCTGTACAGAGCGCTTTATCCAAACGTTGGCGCTCTACTTTGAATCAGTAGTAACGAAAAGCAAGCTCGTAACAA
TGGCACTTTGCCGATTTAGAGAGCTACATCACCATTGAAAGGAATAACAGCGGCTGTAAACCTTGTATGCACTCATCGAGTT
CTGTGCTGGCATTGATTTGCCGGACGAGGTTATCAATCACCAATTATTCAATCGCTCGAAGATGCTTGAATGACCTTATTGCT
TGGTGAACGATATCTTCTTTCAACAGGGAGCAATCTCGCCATGACAGCTTCAACATGGTTTCCATCGTTATGCACCAAGAG
GGCTTTGCGCTTCAGGAAGCTGTCAACTTTGTTGGAGAGCTTTGTAAGGCGATGGAACGTTTTCAGGCGGATAAGAGGA
ATCTCCCTTCATGGGGTCCAGAGATTGACGGGGAGGTCGCAATGTATGTTGATGGGCTGCAGAATTGGATAGTCGGGTCTCTA
AATTGGTCCATCGACGGGACAGAGCGCTATTTCCGCAAAGACGGGCTGGAATAAAGAAGCATAGAATAGTCAAGCTATTCC
CCAAGCGCCATTGAAAACACCTGCTGTGCGGGTTTTGCCTAA
    
```

**Figure S6** Amino acid sequence of full-length, wild-type Cop2

MHHHHHHPSPAGALPKSFILPDLVNDCPFPLRVNPLCDEVGRLSEQWFLRYANYSPRAVAF  
MALKAGELTAACYPDADAFHLRVSDDFMNFLFNADDWLDDFDIEDTYGLANCTVRALRDPVNF  
ITDKRAGLMTKSYFSRFLKTAGPRCTERFIQTLALYFESVVTQKQARNNGTLPDLESYITIRRNN  
SGCKPCYALIEFCAGIDLDPDEVINHPIIQSLEDASNDLIAWSNDIFSFNREQSRHDSFNMVSIVMH  
QKGFALQEAVNFVVGELCKKAMERFQADKRNLP SWGPEIDGEVAMYVDGLQNWIVGSLNWSID  
GTERYFGKDGPGIKKHRIVKLFPRPLKTPAVRVLA-

**Figure S7** Nucleotide sequence of full-length 17H2

ATGCCAAGTCCCGCGGGAGCGCTTCCAAGTCCTCATACTCCCGACCTGGTCAACGACTGCCATTCCCCCTTCGAGTCAACC  
CACTCTGCGACGAGGTTGGGAGACTATCCGAGCAATGGTTCCTCCGCTATGCAAATTATTCGCCCCCTCGGGCAGTGGCGTTTA  
TGGCACAAAGCGGGCGAGCTCTGCTGCTGCTACCCAGATGCCGATGCCTTCCATCTCCGAGTCAGCGACGACTTCATG  
AATTCCTCTTCAATGCCGACGATTGGCTAGACGACTTCGACATTGAGGACACGTACGGGCTGGCCAATTGACTGTTTCGAGCC  
CTGCGCGACCCAGTCAACTTCATTACTGATAAAGCGCGAGGACTAATGACGAAATCATATTTTTCTCGATTCTGAAGACCGCT  
GGGCCTCGCTGTACAGAGCGCTTTATCCAACGTTGGCGCTCTACTTTGAATCAGTAGTAACGCAAAGCAAGCTCGTAACAA  
TGGCACTTTGCCGATTTAGAGAGCTACATCACCATTGGAAGGAATAACAGCGGCTGTAAACCTTGTATGCACTCATCGAGTT  
CTGTGCTGGCATTGATTTGCCGACGAGGTTATCAATCACCCAATTATTCAATCGCTCGAAGATGCTCGAATGACCTTATTGCT  
TGGTGAACGATATCTTCTTTCAACAGGGAGCAATCTCGCCATGACAGCTTCAACATGGTTTCCATCGTTATGCACCAGAAG  
GGCTTTGCGCTTCAGGAAGCTGTCAACTTTGTTGGAGAGCTTTGTAAGGCGATGGAACGTTTTTCAGGCGGATAAGAGGA  
ATCTCCCTTCATGGGGTCCAGAGATTGACGGGGAGGTCGCAATGTATGTTGATGGGCTGCAGAATTGGATAGTGGGTCTCTA  
AATTGGTACATCGACGGGACAGAGCGCTATTTCCGCAAAGACGGGCTGGAATAAAGAAGCATAGAATAGTCAAGCTATTC  
CCAAGCGCCATTGAAAACACCTGCTGTGCGGGTTTTGGCCTAA

**Figure S8** Amino acid sequence of full-length 17H2

MHHHHHHPSPAGALPKSFILPDLVNDCPFPLRVNPLCDEVGRLSEQWFLRYANYSPRAVAF  
MAH KAGELAAACYPDADAFHLRVSDDFMNFLFNADDWLDDFDIEDTYGLANCTVRALRDPVN  
FITDKRAGLMTKSYFSRFLKTAGPRCTERFIQTLALYFESVVTQKQARNNGTLPDLESYITIRRNN  
NSGCKPCYALIEFCAGIDLDPDEVINHPIIQSLEDASNDLIAWSNDIFSFNREQSRHDSFNMVSIVMH  
HQKGFALQEAVNFVVGELCKKAMERFQADKRNLP SWGPEIDGEVAMYVDGLQNWIVGSLNWI  
DGTERYFGKDGPGIKKHRIVKLFPRPLKTPAVRVLA-

**Figure S9** Nucleotide sequence of full-length L59H

ATGCCAAGTCCCGCGGGAGCGCTTCCAAGTCCTCATACTCCCGACCTGGTCAACGACTGCCATTCCCCCTTCGAGTCAACC  
CACTCTGCGACGAGGTTGGGAGACTATCCGAGCAATGGTTCCTCCGCTATGCAAATTATTCGCCCCCTCGGGCAGTGGCGTTTA  
TGGCACAAAGCGGGCGAGCTCACTGCTGCTGCTACCCAGATGCCGATGCCTTCCATCTCCGAGTCAGCGACGACTTCATG  
AATTCCTCTTCAATGCCGACGATTGGCTAGACGACTTCGACATTGAGGACACGTACGGGCTGGCCAATTGACTGTTTCGAGCC  
CTGCGCGACCCAGTCAACTTCATTACTGATAAAGCGCGAGGACTAATGACGAAATCATATTTTTCTCGATTCTGAAGACCGCT  
GGGCCTCGCTGTACAGAGCGCTTTATCCAACGTTGGCGCTCTACTTTGAATCAGTAGTAACGCAAAGCAAGCTCGTAACAA  
TGGCACTTTGCCGATTTAGAGAGCTACATCACCATTGGAAGGAATAACAGCGGCTGTAAACCTTGTATGCACTCATCGAGTT  
CTGTGCTGGCATTGATTTGCCGACGAGGTTATCAATCACCCAATTATTCAATCGCTCGAAGATGCTCGAATGACCTTATTGCT  
TGGTGAACGATATCTTCTTTCAACAGGGAGCAATCTCGCCATGACAGCTTCAACATGGTTTCCATCGTTATGCACCAGAAG  
GGCTTTGCGCTTCAGGAAGCTGTCAACTTTGTTGGAGAGCTTTGTAAGGCGATGGAACGTTTTTCAGGCGGATAAGAGGA  
ATCTCCCTTCATGGGGTCCAGAGATTGACGGGGAGGTCGCAATGTATGTTGATGGGCTGCAGAATTGGATAGTCGGGTCTCTA

AATTGGTCCATCGACGGGACAGAGCGCTATTTGGCAAAGACGGGCCTGGAATAAAGAAGCATAGAATAGTCAAGCTATTCC  
CCAAGCGCCCATTGAAAACACCTGCTGTGCGGGTTTTGCCTAA

**Figure S10** Amino acid sequence of full-length L59H

MHHHHHHPSPAGALPKSFILPDLVNDCPFPLRVNPLCDEVGRLSEQWFLRYANYSPPRAVAF  
MALKAGELTAAACYPDADAFHLRVSDDFMNFLFNADDWLDDFDIEDTYGLANCTVRALRDPVNF  
ITDKRAGLMTKSYFSRFLKTAGPRCTERFIQTLALYFESVVTQKQARNNGTLPDLESYITIRRNN  
SGCKPCYALIEFCAGIDLPEVINHPHIIQSLEDASNDLIAWSNDIFSFNREQSRHDSFNMVSIVMH  
QKGFALQEAVNFVGEELCKKAMERFQADKRNLPSWGPEIDGEVAMYVDGLQNWIVGSLNWSID  
GTERYFGKDGPGIKKHRIVKLFPKRPLKTPAVRVLA-

**Figure S11** Nucleotide sequence of full-length T65A

ATGCCAAGTCCCGCGGGAGCGCTTCCAAGTCCTCATACTCCCGACCTGGTCAACGACTGCCATTCCCCCTCGAGTCAACC  
CACTCTGCGACGAGGTTGGGAGACTATCCGAGCAATGGTTCCTCCGCTATGCAAATTATTCGCCCCCTCGGGCAGTGGCGTTTA  
TGGCACTCAAAGCGGGCAGACTCGCTGCTGCATGCTACCCAGATGCCGATGCCTTCCATCTCCGAGTCAGCGACGACTTCATG  
AACTTCTCTTCAATGCCGACGATTGGCTAGACGACTTCGACATTGAGGACACGTACGGGCTGGCCAATTGTACTGTTGAGCC  
CTGCGCGACCCAGTCAACTTCATTACTGATAAACGCGCAGGACTAATGACGAAATCATATTTTTCTCGATTCTGAAGACCGCT  
GGGCTCGCTGTACAGAGCGCTTTATCCAACGTTGGCGCTCTACTTTGAATCAGTAGTAACGCAAAGCAAGCTCGTAACAA  
TGGCACTTTGCCGATTTAGAGAGCTACATCACCATTGAAAGGAATAACAGCGGCTGTAAACCTGTTATGCACTCATCGAGTT  
CTGTGCTGGCATTGATTTGCCGGACGAGGTTATCAATCACCCAATTATTCAATCGCTCGAAGATGCTTGAATGACCTTATTGCT  
TGGTGAACGATATCTTCTTTCAACAGGGAGCAATCTCGCCATGACAGCTTCAACATGGTTTTCCATCGTTATGCACCAGAAG  
GGCTTTGCGCTTCAGGAAGCTGTCAACTTTGTTGGAGAGCTTTGTAAAAAGCGATGGAACGTTTTTCAGGCGGATAAGAGGA  
ATCTCCCTTCATGGGGTCCAGAGATTGACGGGGAGGTCGCAATGTATGTTGATGGGCTGCAGAATTGGATAGTCGGGTCTTA  
AATTGGTCCATCGACGGGACAGAGCGCTATTTGGCAAAGACGGGCCTGGAATAAAGAAGCATAGAATAGTCAAGCTATTCC  
CCAAGCGCCCATTGAAAACACCTGCTGTGCGGGTTTTGCCTAA

**Figure S12** Amino acid sequence of full-length T65A

MHHHHHHPSPAGALPKSFILPDLVNDCPFPLRVNPLCDEVGRLSEQWFLRYANYSPPRAVAF  
MALKAGELTAAACYPDADAFHLRVSDDFMNFLFNADDWLDDFDIEDTYGLANCTVRALRDPVNF  
ITDKRAGLMTKSYFSRFLKTAGPRCTERFIQTLALYFESVVTQKQARNNGTLPDLESYITIRRNN  
SGCKPCYALIEFCAGIDLPEVINHPHIIQSLEDASNDLIAWSNDIFSFNREQSRHDSFNMVSIVMH  
QKGFALQEAVNFVGEELCKKAMERFQADKRNLPSWGPEIDGEVAMYVDGLQNWIVGSLNWSID  
GTERYFGKDGPGIKKHRIVKLFPKRPLKTPAVRVLA-

**Figure S13** Nucleotide sequence of full-length S310Y

ATGCCAAGTCCCGCGGGAGCGCTTCCAAGTCCTCATACTCCCGACCTGGTCAACGACTGCCATTCCCCCTCGAGTCAACC  
CACTCTGCGACGAGGTTGGGAGACTATCCGAGCAATGGTTCCTCCGCTATGCAAATTATTCGCCCCCTCGGGCAGTGGCGTTTA  
TGGCACTCAAAGCGGGCAGACTACTGCTGCATGCTACCCAGATGCCGATGCCTTCCATCTCCGAGTCAGCGACGACTTCATG  
AACTTCTCTTCAATGCCGACGATTGGCTAGACGACTTCGACATTGAGGACACGTACGGGCTGGCCAATTGTACTGTTGAGCC  
CTGCGCGACCCAGTCAACTTCATTACTGATAAACGCGCAGGACTAATGACGAAATCATATTTTTCTCGATTCTGAAGACCGCT

GGGCCTCGCTGTACAGAGCGCTTTATCCAAACGTTGGCGCTCTACTTTGAATCAGTAGTAACGCAAAGCAAGCTCGTAACAA  
TGGCACTTTGCCGATTTAGAGAGCTACATCACCATTGGAAGGAATAACAGCGGCTGTAAACCTTGTTATGCACTCATCGAGTT  
CTGTGCTGGCATTGATTTGCCGGACGAGGTTATCAATCACCCAATTATTCAATCGCTCGAAGATGCTTGAATGACCTTATTGCT  
TGGTCGAACGATATCTTCTTTCAACAGGGAGCAATCTCGCCATGACAGCTTCAACATGGTTTCCATCGTTATGCACCAGAAG  
GGCTTTGCGCTTCAGGAAGCTGTCAACTTTGTTGGAGAGCTTTGAAAAAGGCGATGGAACGTTTTTCAGGCGGATAAGAGGA  
ATCTCCCTTCATGGGGTCCAGAGATTGACGGGGAGGTCGCAATGTATGTTGATGGGCTGCAGAATTGGATAGTCGGGTCTCTA  
AATTGGTACATCGACGGGACAGAGCGCTATTTGGCAAAGACGGGCCTGGAATAAAGAAGCATAGAATAGTCAAGCTATTCC  
CCAAGCGCCATTGAAAACACCTGCTGTGCGGGTTTTGGCCTAA

**Figure S14** Amino acid sequence of full-length S310Y

MHHHHHHPSPAGALPKSFILPDLVNDCPFPLRVNPLCDEVGRLSEQWFLRYANYSPPRAVAF  
MALKAGELTAACYPDADAFHLRVSDDFMNFLFNADDWLDDFDIEDTYGLANCTVRALRDPVNF  
ITDKRAGLMTKSYFSRFLKTAGPRCTERFIQTLALYFESVVTQKQARNNGTLPDLESYITIRRN  
SGCKPCYALIEFCAGIDLPDEVINHPIIQSLEDASNDLIAWSNDIFSFNREQRSRHDSFNMVSIVMH  
QKGFALQEAVNFVVELCKKAMERFQADKRNLP SWGPEIDGEVAMYVDGLQNWIVGSLNWYID  
GTERYFGKDGPGIKKHRIVKLFPKRPLKTPAVRVLA-
